# Supplementary material for: The Acinetobacter baumannii disinfectant resistance protein, AmvA, is a spermidine and spermine efflux pump
Source: PubMed Central journal article supplement (PMC8458285; doi:10.1038/s42003-021-02629-6), 2021-09-22
Supplement: 42003_2021_2629_MOESM2_ESM.pdf [file 42003_2021_2629_MOESM2_ESM.pdf]

## Supplementary Information

### Supplementary Figures

**Supplementary Figure 1** Divergent regulatory and phenotypic effects of polyamines

**Supplementary Figure 2** Mutation of *amvA*, *amvR* or *adeB* does not alter tolerance to short-chain polyamines.

**Supplementary Figure 3** Effect of polyamines and AmvR on expression of an *amvA*<sub>prom</sub>-GFP reporter.

**Supplementary Figure 4** Purification and binding studies of AmvR

### Supplementary Tables

**Supplementary Table 1** Sequencing statistics

**Supplementary Table 2** Polyamine-regulated genes of interest

**Supplementary Table 3** Summary of isothermal analysis with fitted  $\Delta C_p$

**Supplementary Table 4** Summary of isothermal analysis with  $\Delta C_p$  set to zero

**Supplementary Table 5** Bacterial strains used in this study

**Supplementary Table 6** Plasmids used in this study

**Supplementary Table 7** Oligonucleotides used in this study

### Supplementary References

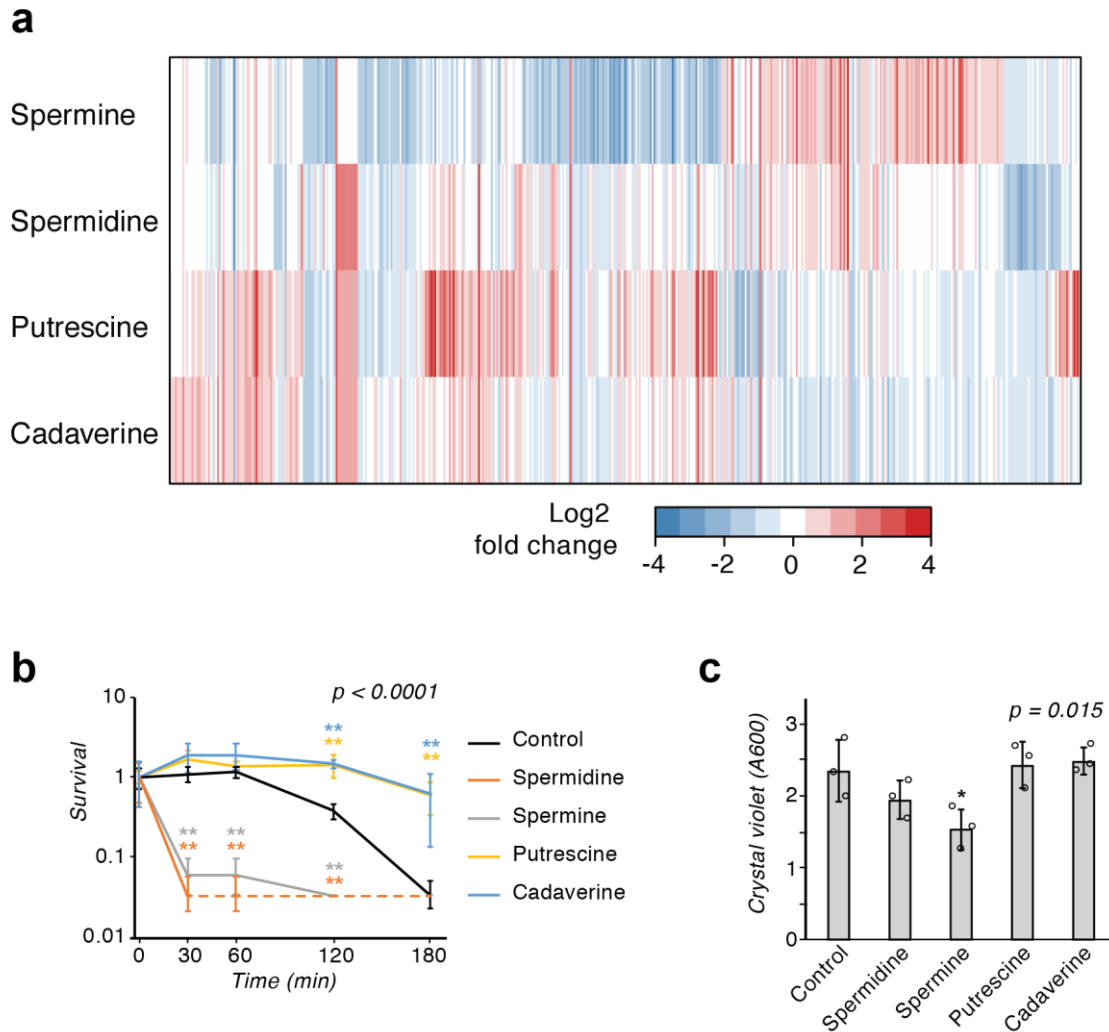

**Supplementary Figure 1.** Divergent regulatory and phenotypic effects of polyamines (A) Heatmap of expression changes following polyamine shock, showing the direction of expression change, and concordance between different polyamines. (B) Serum survival curves following treatment of  $10^6$  cells with 66% normal human serum supplemented with polyamines at 1/8 MIC ( $n = 3$  biological replicates). The chart shows geometric mean and standard deviation. Statistical significance was determined by two-factor repeated measures ANOVA on  $\log_{10}$ -transformed survival data (overall  $p$ -value  $< 0.0001$ ) followed by a one-factor ANOVA with Dunnett's post-hoc test at individual time points to compare all samples to the control.  $**p < 0.01$ . (C) Biofilm formation in the presence of polyamines ( $n = 3$  biological replicates). Static 2.5ml cultures with or without polyamine supplementation were incubated for 40 hours at 37C, and the attached biomass quantified by crystal violet staining. Shown are the mean and standard deviation for each treatment.  $*p < 0.05$ , one-way ANOVA with Dunnett's post-hoc test (overall  $p$ -value = 0.015).

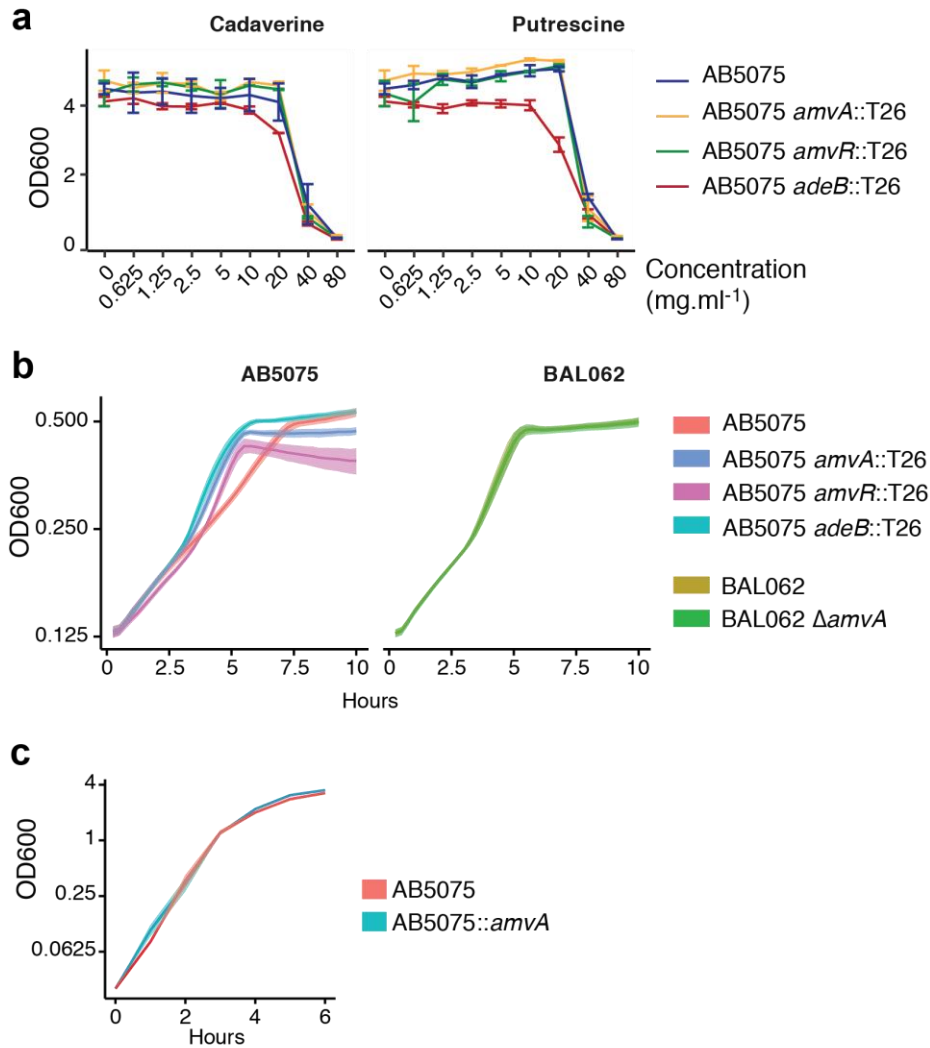

**Supplementary Figure 2.** Mutation of *amvA*, *amvR* or *adeB* does not alter tolerance to short-chain polyamines. (A) Cadaverine and putrescine MIC determination with *A. baumannii* AB5075 and mutant strains, mean  $\pm$  standard deviation for two biological and two technical replicates. (B) Growth curve of *A. baumannii* AB5075 and BAL062 and mutants in 96-well plate format with shaking every 15 min. Results shown are mean  $\pm$  standard deviation from three biological replicates, each comprised of five technical replicates (C) Growth curve of *A. baumannii* AB5075 and *tn::amvA* mutant in aerobic conditions. Results are mean  $\pm$  standard deviation from three biological replicates.

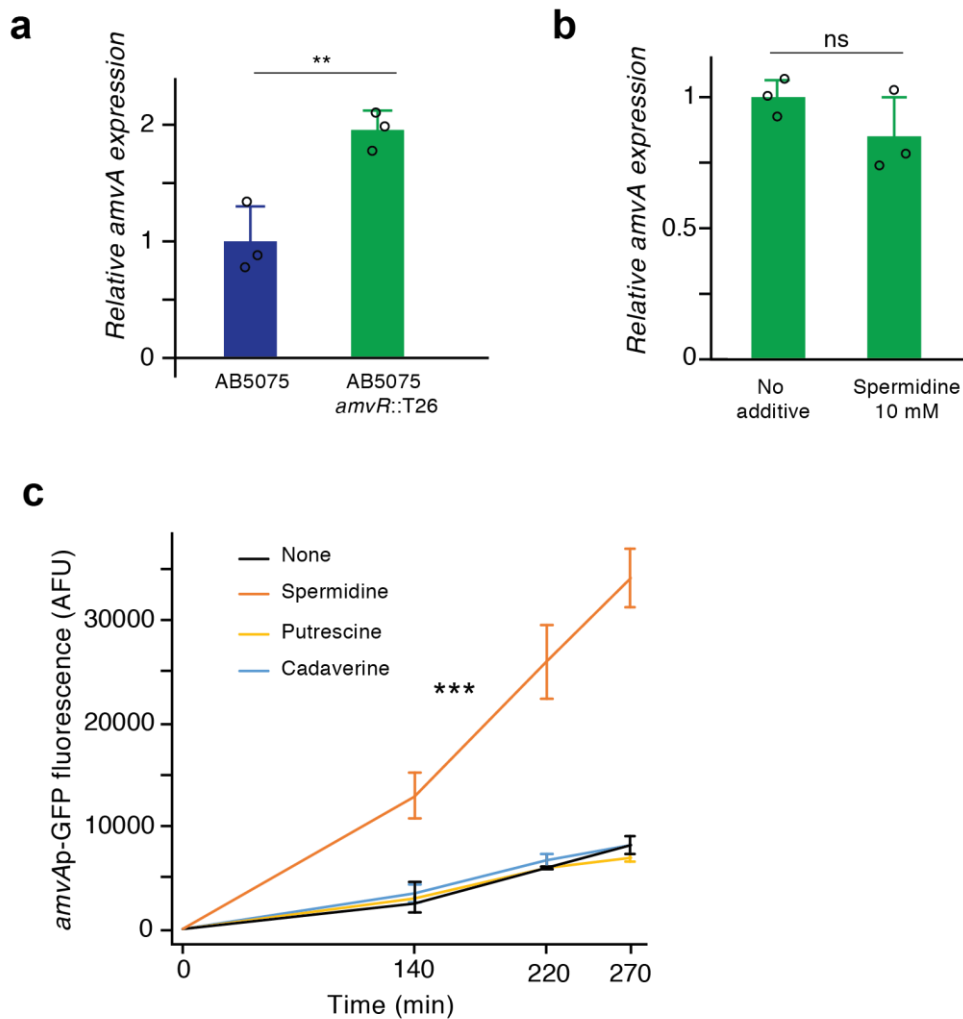

**Supplementary Figure 3.** Effect of polyamines and AmvR on expression of an *amvA*<sub>prom</sub>-GFP reporter. (A) Fluorescence of GFP in *A. baumannii* AB5075 or *A. baumannii* AB5075-tn-*amvR* carrying the *amvA* expression reporter vector pFLS45. Reporter fluorescence was measured in cultures grown aerobically to OD = 2. Results shown are the mean  $\pm$  standard deviation from three biological replicates, \*\*  $p < 0.01$ , one-way ANOVA. (B) Induction of *amvA*<sub>prom</sub>-GFP expression by SPD does not occur in AB5075 tn-*amvR*. Results are mean  $\pm$  standard deviation for three biological replicates. (C) Induction of *amvA* expression in *A. baumannii* ATCC17978 pFLS43 by 10 mM cadaverine, putrescine or spermidine. Note that cells did not grow when 10 mM spermine was added. Results shown are mean  $\pm$  standard deviation from three biological replicates, each comprised of five technical replicates. Each polyamine-treated data series was compared to the untreated control by mixed-repeated measures ANOVA, \*\*\*  $p < 0.0001$ .

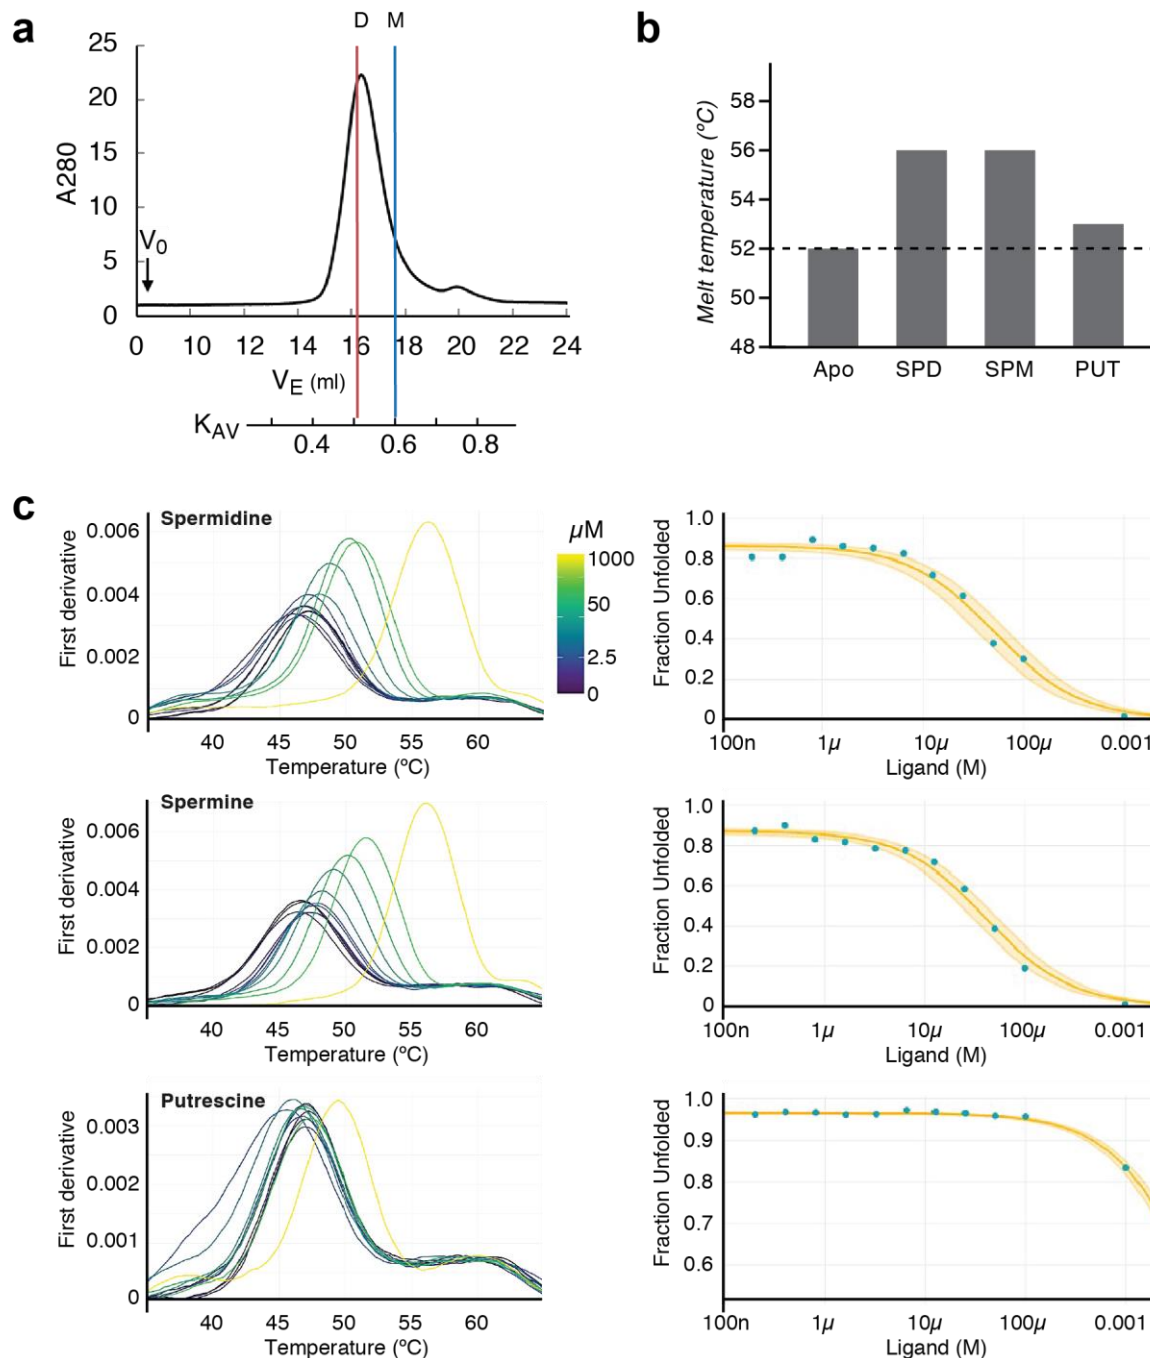

**Supplementary Figure 4.** Purification and DSF analysis of AmvR. (A) Analytical size exclusion chromatography trace for AmvR on Superdex 200.  $V_T = 24$  ml,  $V_0 = 8.34$  ml. Predicted elution positions are indicated for the theoretical dimer (D) and monomer (M) forms. (B) Shifts in melting temperature of purified AmvR in the presence of polyamines.  $T_m$  increases of  $4^{\circ}\text{C}$  were seen in the presence of spermine and spermidine, while putrescine caused a  $1^{\circ}\text{C}$  shift. Experiments were performed in triplicate and gave identical  $T_m$  values. (C) Derivative (left) and fitted (right) nanoDSF isothermal analysis measurements for AmvR in the presence of spermine, spermidine and putrescine. This experiment is a replicate of that in Figure 4B.

**Supplementary Table 1** RNA sequence-reads and overall alignment rate in *ABUW-5075*

| Polyamines                   | Average sequence reads | Overall alignment rate |
|------------------------------|------------------------|------------------------|
| Spermidine tri-hydrochloride | 11,090,209 ± 210,756   | 98.77%                 |
| Spermine tetra-hydrochloride | 10,414,484 ± 541,477   | 98.82%                 |
| Putrescine di-hydrochloride  | 11,194,537 ± 1,155,240 | 99.19%                 |
| Cadaverine di-hydrochloride  | 10,833,984 ± 487,424   | 98.96%                 |

**Supplementary Table 2** Polyamine-regulated genes of interest (xlsx). Abbreviations: PUT = putrescine, CAD = cadaverine, SPD = spermidine, SPM = spermine. Shown are locus tags, functional categories, specific regulation by polyamines, and any related enriched GO terms.

| Locus tag(s)                    | Function                                                | Induced by                                              | Repressed by | Significant GO term enrichments                           |
|---------------------------------|---------------------------------------------------------|---------------------------------------------------------|--------------|-----------------------------------------------------------|
| <b>Metabolism</b>               |                                                         |                                                         |              |                                                           |
| <b>Amino acid catabolism</b>    |                                                         |                                                         |              |                                                           |
| ABUW_0069-71                    | Phe degradation/transport                               | PUT                                                     | SPM          | GO:0006559 L-phenylalanine catabolic process (PUT)        |
| ABUW_0077-81                    | Histidine utilisation                                   | PUT (ABUW_0077-81); SPD (ABUW_0077-8)                   |              | GO:0006548 Histidine catabolic process (PUT)              |
| ABUW_2451-2456                  | L-leucine degradation                                   | PUT (ABUW_2451-6); SPD (ABUW_2452-3); CAD (ABUW_2454-6) | SPM          | GO:0006552 leucine catabolic process (PUT, CAD, SPD, SPM) |
| <b>Lipid metabolism</b>         |                                                         |                                                         |              |                                                           |
| ABUW_1572-4                     | acyl-CoA dehydrogenase/ligase/short-chain dehydrogenase | SPD; PUT; CAD                                           |              |                                                           |
| ABUW_2095-9                     | <i>ato</i> fatty acid utilisation operon                | PUT (ABUW_2096-9); CAD (ABUW_2096-7)                    | SPM          |                                                           |
| <b>Aerobic respiration</b>      |                                                         |                                                         |              |                                                           |
| ABUW_1792-1795                  | cytochrome D operon                                     |                                                         | PUT          |                                                           |
| ABUW_3733-4                     | ATP synthase F1                                         |                                                         | PUT          |                                                           |
| <b>Other metabolic pathways</b> |                                                         |                                                         |              |                                                           |
| ABUW_0201, 0203-4               | GABA degradation                                        | PUT                                                     |              |                                                           |

| Locus tag(s)                          | Function                           | Induced by                                              | Repressed by                                        | Significant GO term enrichments                       |
|---------------------------------------|------------------------------------|---------------------------------------------------------|-----------------------------------------------------|-------------------------------------------------------|
| ABUW_1831-9                           | protocatechuate utilisation        | PUT (ABUW_1831-9); SPD (ABUW_1831-4)                    |                                                     |                                                       |
| ABUW_1840-1                           | quininate degradation              | PUT                                                     |                                                     |                                                       |
|                                       |                                    |                                                         |                                                     |                                                       |
| <b>Virulence, resistance and HGT</b>  |                                    |                                                         |                                                     |                                                       |
| <b>Iron acquisition</b>               |                                    |                                                         |                                                     |                                                       |
| ABUW_0159                             | TonB siderophore uptake            | SPD; SPM                                                |                                                     | GO:0006826 iron ion transport (SPM)                   |
| ABUW_1170, 1175-77                    | Acinetobactin transport            | SPM                                                     |                                                     | GO:0044718 siderophore transmembrane transport (SPM)  |
| ABUW_1355                             | hemin uptake (hemP)                | SPD; SPM; PUT                                           |                                                     |                                                       |
| ABUW_2184-9                           | aerobactin                         | SPM (ABUW_2184-9); SPD (ABUW_2185-9); PUT (ABUW_2188-9) |                                                     | GO:0019270 aerobactin biosynthetic process (SPD, SPM) |
| ABUW_2324                             | heme oxygenase-like protein        |                                                         | SPM                                                 |                                                       |
| ABUW_3125                             | bacterioferritin                   |                                                         | SPD; SPM                                            |                                                       |
| ABUW_3632-3                           | ferrous iron transport feoAB       | SPD (ABUW_3632-3); PUT (ABUW_3633)                      |                                                     |                                                       |
|                                       |                                    |                                                         |                                                     |                                                       |
| <b>Motility, adhesion and defense</b> |                                    |                                                         |                                                     |                                                       |
| ABUW_0291-292, 304, 3031-2            | Type IV pilus                      |                                                         | PUT (ABUW_0291-2, 304, 3031-2); CAD (ABUW_0291-2)   | GO:0043107 Type IV pilus-dependent motility (PUT)     |
| ABUW_0678, 80                         | Type IV pilus (response regulator) |                                                         | PUT                                                 |                                                       |
| ABUW_1488-91                          | Csu pilus                          |                                                         | SPM (ABUW_1491); PUT (ABUW_1489); CAD (ABUW_1488-9) | GO:0009297 pilus assembly (CAD)                       |
| ABUW_2572-5                           | Type VI secretion                  |                                                         | SPM (ABUW_2572-5); CAD (ABUW_2576-7)                |                                                       |
| ABUW_1088-1090, 1096                  | Type I-F CRISPR                    |                                                         | SPM                                                 |                                                       |

| Locus tag(s)                | Function                                                    | Induced by                       | Repressed by                                              | Significant GO term enrichments                         |
|-----------------------------|-------------------------------------------------------------|----------------------------------|-----------------------------------------------------------|---------------------------------------------------------|
|                             |                                                             |                                  |                                                           |                                                         |
| <b>Resistance functions</b> |                                                             |                                  |                                                           |                                                         |
| ABUW_1673                   | acel                                                        | SPD; PUT; CAD                    |                                                           |                                                         |
| ABUW_1678                   | amvR (regulator)                                            | SPD; SPM; PUT; CAD               |                                                           |                                                         |
| ABUW_1679                   | smvA                                                        | SPD; SPM                         |                                                           |                                                         |
| ABUW_1974-6                 | adeABC efflux pump                                          | SPD; SPM; PUT; CAD               |                                                           |                                                         |
| ABUW_1352                   | Peroxide stress response                                    |                                  | SPD; SPM; PUT; CAD                                        | GO:0070301 cellular response to hydrogen peroxide       |
| ABUW_2436                   | katE                                                        | PUT; CAD                         |                                                           | GO:0070301 cellular response to hydrogen peroxide (CAD) |
| ABUW_3227-8                 | pcoAB copper resistance protein                             | SPM                              |                                                           |                                                         |
| ABUW_3320-2, ABUW_3325      | copAB copper resistance, copper-translocating P-type ATPase | PUT; CAD                         |                                                           | GO:0035434 copper ion transmembrane transport           |
|                             |                                                             |                                  |                                                           |                                                         |
| <b>Unknown</b>              |                                                             |                                  |                                                           |                                                         |
| ABUW_0233                   |                                                             | SPD; SPM; PUT; CAD               |                                                           |                                                         |
|                             |                                                             |                                  |                                                           |                                                         |
| <b>Prophage genes</b>       |                                                             |                                  |                                                           |                                                         |
| ABUW_0741-91                | Prophage region 2                                           |                                  | SPD (ABUW_0741, 52, 0756, 0758, 0762-4, 0774, 0780, 0791) |                                                         |
| ABUW_1255-1286              | Prophage region 3                                           | PUT (ABUW_1255-60, 1266-7, 1286) | SPM (ABUW_1261-63)                                        |                                                         |
| ABUW_1297-1311              | Prophage region 4                                           |                                  | SPD (ABUW_1297); SPM (ABUW_1298, 1301, 1304, 1309, 1311)  |                                                         |
| ABUW_1394-1439              | Prophage region 5                                           |                                  | SPD (ABUW_1394, 1414-5, 1421, 1425, 1438-9)               |                                                         |
| ABUW_2655-2673              | Prophage region 6                                           | SPD (ABUW_2669); SPM (ABUW_2669) | SPM (ABUW_2655, 2666, 2673); PUT (ABUW_2665);             |                                                         |



| Locus tag(s) | Function | Induced by | Repressed by       | Significant GO term enrichments |
|--------------|----------|------------|--------------------|---------------------------------|
|              |          |            | CAD<br>(ABUW_2666) |                                 |

**Supplementary Table 3** Summary of isothermal analysis with fitted  $\Delta C_p$

|                   | Replicate 1           |           |                          | Replicate 2            |            |                          |
|-------------------|-----------------------|-----------|--------------------------|------------------------|------------|--------------------------|
|                   | Heating rate          | 2 °C/min  |                          | Heating rate           | 1.5 °C/min |                          |
| AmvR (15 $\mu$ M) | $\Delta C_p$          | $T_{sel}$ | $K_{d, T_{sel}}$ (Ratio) | $\Delta C_p$           | $T_{sel}$  | $K_{d, T_{sel}}$ (Ratio) |
| Spermidine        | Fitted: 8.34 kcal/mol | 49 °C     | 9.5 $\mu$ M $\pm$ 13%    | Fitted: 9.61 kcal/mol  | 49 °C      | 6.8 $\mu$ M $\pm$ 21%    |
| Spermine          | Fitted: 8.34 kcal/mol | 49 °C     | 5.4 $\mu$ M $\pm$ 13%    | Fitted: 10.73 kcal/mol | 49 °C      | 5.2 $\mu$ M $\pm$ 17%    |
| Putrescine        | Fitted: 7.57 kcal/mol | 51 °C     | 260 $\mu$ M $\pm$ 6%     | Fitted: 7.18 kcal/mol  | 51 °C      | 220 $\mu$ M $\pm$ 8%     |

$T_{sel}$  is the temperature with the lowest fitting error for  $K_d$

**Supplementary Table 4** Summary of isothermal analysis with  $\Delta C_p$  set to zero

|                   | Replicate 1         |           |                          | Replicate 2         |            |                          |
|-------------------|---------------------|-----------|--------------------------|---------------------|------------|--------------------------|
|                   | Heating rate        | 2 °C/min  |                          | Heating rate        | 1.5 °C/min |                          |
| AmvR (15 $\mu$ M) | $\Delta C_p$        | $T_{sel}$ | $K_{d, T_{sel}}$ (Ratio) | $\Delta C_p$        | $T_{sel}$  | $K_{d, T_{sel}}$ (Ratio) |
| Spermidine        | Default: 0 kcal/mol | 49 °C     | 10 $\mu$ M $\pm$ 17%     | Default: 0 kcal/mol | 49 °C      | 8 $\mu$ M $\pm$ 20%      |
| Spermine          | Default: 0 kcal/mol | 49 °C     | 5.8 $\mu$ M $\pm$ 15%    | Default: 0 kcal/mol | 49 °C      | 6.1 $\mu$ M $\pm$ 18%    |
| Putrescine        | Default: 0 kcal/mol | 51 °C     | 310 $\mu$ M $\pm$ 6%     | Default: 0 kcal/mol | 51 °C      | 330 $\mu$ M $\pm$ 7%     |

$T_{sel}$  is the temperature with the lowest fitting error for  $K_d$

**Supplementary Table 5** Bacterial strains used in this study

| Strain                                                     | Description/genotype                                                                                                                                                                                                                                             | Source              |
|------------------------------------------------------------|------------------------------------------------------------------------------------------------------------------------------------------------------------------------------------------------------------------------------------------------------------------|---------------------|
| <i>Acinetobacter baumannii</i> AB5075-UW                   | Drug-resistant isolate, International clonal lineage 1                                                                                                                                                                                                           | (1)                 |
| <i>Acinetobacter baumannii</i> ATCC17978                   | Drug-susceptible isolate                                                                                                                                                                                                                                         | ATCC                |
| <i>Escherichia coli</i> DH5 $\alpha$                       | Cloning strain, F <sup>-</sup> $\phi$ 80 <i>lacZ</i> $\Delta$ M15 $\Delta$ ( <i>lacZYA-argF</i> )U169 <i>recA1 endA1 hsdR17</i> (r <sub>K</sub> <sup>-</sup> , m <sub>K</sub> <sup>+</sup> ) <i>phoA supE44</i> $\lambda$ <sup>-</sup> <i>thi-1 gyrA96 relA1</i> | Invitrogen          |
| <i>Escherichia coli</i> BL21(DE3)                          | Protein expression strain, F <sup>-</sup> <i>ompT hsdS<sub>B</sub></i> (r <sub>B</sub> <sup>-</sup> , m <sub>B</sub> <sup>-</sup> ) <i>gal dcm</i> (DE3)                                                                                                         | New England Biolabs |
| <i>Acinetobacter baumannii</i> AB5075-UW <i>amvA</i> ::T26 | AB5075-UW ABUW_1679::420(+)T26 ( <i>amvA</i> ), item AB04444                                                                                                                                                                                                     | (2)                 |
| <i>Acinetobacter baumannii</i> AB5075-UW <i>amvR</i> ::T26 | AB5075_UW ABUW-1678::263(+)T26 ( <i>amvR</i> ), item AB04443                                                                                                                                                                                                     | (2)                 |
| <i>Acinetobacter baumannii</i> AB5075-UW <i>adeB</i> ::T26 | AB5075-UW ABUW_1975::1030(+)T26 ( <i>adeB</i> ), item AB05228                                                                                                                                                                                                    | (2)                 |
| <i>Acinetobacter baumannii</i> BAL062                      | Isolate of international clonal lineage 2                                                                                                                                                                                                                        | (3)                 |
| <i>Acinetobacter baumannii</i> BAL062 $\Delta$ <i>amvA</i> | Deletion mutant of <i>amvA</i> , constructed by linear fragment transformation with construct generated with primers AP2064 and FS175-179                                                                                                                        | This study          |

**Supplementary Table 6** Plasmids used in this study

| Name                                  | Description                                                                        | Source     |
|---------------------------------------|------------------------------------------------------------------------------------|------------|
| pVRL1                                 | <i>E. coli</i> - <i>A. baumannii</i> shuttle vector, Gm <sup>R</sup>               | (4)        |
| pVRL1-Z                               | <i>E. coli</i> - <i>A. baumannii</i> shuttle vector, Zeo <sup>R</sup>              | (4)        |
| pFLS43                                | GFP with <i>amvA</i> promoter (100bp) in pVRL1                                     | This study |
| pFLS45                                | GFP with <i>amvA</i> promoter (100bp) in pVRL1-Z                                   | This study |
| pTTQ18 <sub>RGSH6</sub>               | IPTG-inducible expression vector, C-terminal 6xHis tag                             | (5)        |
| pTTQ18 <sub>RGSH6</sub> - <i>amvA</i> | <i>amvA</i> gene (previously named <i>aedF</i> ) from ATCC17978 cloned into pTTQ18 | (6)        |
| pAmvR                                 | <i>AmvR</i> gene from ATCC17978 cloned into pTTQ18 <sub>RGSH6</sub>                | This study |
| pCR2.1                                | TOPO cloning vector, Amp <sup>R</sup>                                              | Invitrogen |
| pDiGc                                 | Fluorescence reporter vector with GFP and dsRED; GFP source                        | (7)        |

**Supplementary Table 7** Oligonucleotides used in this study

| <b>Name</b>           | <b>Sequence (5'-3' direction)</b>                       | <b>Description</b>                      |
|-----------------------|---------------------------------------------------------|-----------------------------------------|
| AmvR-F                | ttcacacaggaaacagcgcgatggcctatcttaatcgcat                | AmvR gene Fwd                           |
| AmvR-R                | cggccacctctgcagccgattggaagtacaggttcttaataattctaggc<br>g | AmvR gene Rev                           |
| AP2064                | gtgtggatccatgattccaaaaggaatgaa                          | <i>amvA</i> linear fragment mutagenesis |
| FS09                  | agaggagctcgatcccgagttcatgc                              | pDiGc marker fragment Fwd               |
| FS10                  | gtgtctcgagagagttgtagaaacgcaaaaagg                       | pDiGc marker fragment Rev               |
| FS65                  | tgcgagataccgatcacatgaaacagcatgacttttc                   | GFP overlap primer Fwd                  |
| FS66                  | gtcatgctgtttcatgtgatctgggatctcgca                       | GFP overlap primer Rev                  |
| FS76                  | gagacatatggtttgttacacctgactg                            | <i>amvA-amvR</i> intergenic Fwd         |
| FS77                  | gagacatatgaacgctcttcgatatcca                            | <i>amvA-amvR</i> intergenic Rev         |
| FS175                 | gtgtggatccatgattccaaaaggaatgaa                          | <i>amvA</i> linear fragment mutagenesis |
| FS176                 | atcgaagagcgttatgccgaattgccagctggggc                     | <i>amvA</i> linear fragment mutagenesis |
| FS177                 | tactttcttcgaaattcagaagaactcgtcaagaaggc                  | <i>amvA</i> linear fragment mutagenesis |
| FS178                 | cgagttcttctgaattccgaagaaagtaaattaatatttttc              | <i>amvA</i> linear fragment mutagenesis |
| FS179                 | ctaaattggagtaataactggctcac                              | <i>amvA</i> linear fragment mutagenesis |
| qPCR_ <i>amvA</i> _F  | ccatgattgctttggttggc                                    | qPCR primer                             |
| qPCR_ <i>amvA</i> _R  | acctgctaattggaccacct                                    | qPCR primer                             |
| qPCR_ <i>gadph</i> _F | caacactggtaaatggcgtg                                    | qPCR primer                             |
| qPCR_ <i>gadph</i> _R | acaacgttttcatttcggc                                     | qPCR primer                             |

## Supplementary references

1. Jacobs AC, Thompson MG, Black CC, Kessler JL, Clark LP, McQueary CN, Gancz HY, Corey BW, Moon JK, Si Y, Owen MT, Hallock JD, Kwak YI, Summers A, Li CZ, Rasko DA, Penwell WF, Honnold CL, Wise MC, Waterman PE, Lesho EP, Stewart RL, Actis LA, Palys TJ, Craft DW, Zurawski D V. 2014. AB5075, a Highly Virulent Isolate of *Acinetobacter baumannii*, as a Model Strain for the Evaluation of Pathogenesis and Antimicrobial Treatments. *MBio* 5:e01076-14.
2. Gallagher LA, Ramage E, Weiss EJ, Radey M, Hayden HS, Held KG, Huse HK, Zurawski D V., Brittnacher MJ, Manoil C. 2015. Resources for genetic and genomic analysis of emerging pathogen *Acinetobacter baumannii*. *J Bacteriol* 197:2027–2035.
3. Hassan KA, Cain AK, Huang T, Liu Q, Elbourne LDH, Boinett CJ, Brzoska AJ, Li L, Ostrowski M, Nhu NTK, Nhu TDH, Baker S, Parkhill J, Paulsen IT. 2016. Fluorescence-based flow sorting in parallel with transposon insertion site sequencing identifies multidrug efflux systems in *acinetobacter baumannii*. *MBio* 7:3–8.
4. Lucidi M, Runci F, Rampioni G, Frangipani E, Leoni L, Visca P. 2018. New shuttle vectors for gene cloning and expression in multidrug-resistant *Acinetobacter* species. *Antimicrob Agents Chemother* 62:1–19.
5. Stark MJ. 1987. Multicopy expression vectors carrying the lac repressor gene for regulated high-level expression of genes in *Escherichia coli*. *Gene* 51:255–267.
6. Hassan KA, Brzoska AJ, Wilson NL, Eijkelkamp BA, Brown MH, Paulsen IT. 2011. Roles of DHA2 family transporters in drug resistance and iron homeostasis in *Acinetobacter* spp. *J Mol Microbiol Biotechnol* 20:116–124.
7. Helaine S, Thompson JA, Watson KG, Liu M, Boyle C, Holden DW. 2010. Dynamics of intracellular bacterial replication at the single cell level. *Proc Natl Acad Sci U S A* 107:3746–3751.
