# Supplementary material for: The Acinetobacter baumannii disinfectant resistance protein, AmvA, is a spermidine and spermine efflux pump
Source: PubMed Central journal article supplement (PMC8458285; doi:10.1038/s42003-021-02629-6), 2021-09-22
Supplement: 42003_2021_2629_MOESM3_ESM.pdf [file 42003_2021_2629_MOESM3_ESM.pdf]

## Description of Additional Supplementary Files

**File name:** Supplementary Data 1

**Description:** Polyamine-induced gene expression changes in *A. baumannii* AB5075.

**File name:** Supplementary Data 2

**Description:** *A. baumannii* pangenome gene presence-absence table.

**File name:** Supplementary Data 3

**Description:** Source data for figures.
